# Supplementary material for: Modulation of the Tumor Microenvironment with Trastuzumab Enables Radiosensitization in HER2+ Breast Cancer
Source: MDPI journal article supplement (doi:10.3390/cancers14041015), 2022-02-17
Supplement: s1 [file s1]

| TUMOR MODEL                                  |        | SUV <sub>mean</sub> |             |             |
|----------------------------------------------|--------|---------------------|-------------|-------------|
| BT474                                        | Tissue | Day 0               | Day 3       | Day 7       |
| Control (N = 5)                              | Tumor  | 0.19 ± 0.06         | 0.22 ± 0.10 | 0.23 ± 0.12 |
|                                              | Muscle | 0.11 ± 0.03         | 0.13 ± 0.04 | 0.12 ± 0.01 |
| Trastuzumab (N = 6)                          | Tumor  | 0.18 ± 0.07         | 0.13 ± 0.05 | 0.14 ± 0.08 |
|                                              | Muscle | 0.10 ± 0.04         | 0.13 ± 0.04 | 0.12 ± 0.01 |
| Fractionated radiation (N = 6)               | Tumor  | 0.16 ± 0.06         | 0.16 ± 0.08 | 0.20 ± 0.09 |
|                                              | Muscle | 0.12 ± 0.06         | 0.11 ± 0.05 | 0.13 ± 0.08 |
| Trastuzumab → Fractionated radiation (N = 7) | Tumor  | 0.17 ± 0.06         | 0.15 ± 0.08 | 0.15 ± 0.06 |
|                                              | Muscle | 0.11 ± 0.05         | 0.09 ± 0.04 | 0.10 ± 0.03 |
| MDA-MB-361                                   | Tissue | Day 0               | Day 3       | Day 7       |
| Control (N = 5)                              | Tumor  | 0.20 ± 0.05         | 0.19 ± 0.08 | 0.32 ± 0.10 |
|                                              | Muscle | 0.12 ± 0.03         | 0.11 ± 0.02 | 0.16 ± 0.05 |
| Trastuzumab (N = 4)                          | Tumor  | 0.19 ± 0.01         | 0.15 ± 0.03 | 0.18 ± 0.02 |
|                                              | Muscle | 0.13 ± 0.01         | 0.11 ± 0.01 | 0.14 ± 0.02 |
| Fractionated radiation (N = 5)               | Tumor  | 0.22 ± 0.02         | 0.23 ± 0.07 | 0.31 ± 0.06 |
|                                              | Muscle | 0.12 ± 0.02         | 0.11 ± 0.03 | 0.17 ± 0.10 |
| Trastuzumab → Fractionated radiation (N = 5) | Tumor  | 0.20 ± 0.03         | 0.20 ± 0.07 | 0.19 ± 0.09 |
|                                              | Muscle | 0.13 ± 0.03         | 0.12 ± 0.03 | 0.15 ± 0.04 |
| BCM 3472                                     | Tissue | Day 0               | Day 3       | Day 7       |
| Control (N = 5)                              | Tumor  | 0.13 ± 0.06         | 0.12 ± 0.04 | 0.20 ± 0.04 |
|                                              | Muscle | 0.09 ± 0.04         | 0.10 ± 0.04 | 0.10 ± 0.02 |
| Trastuzumab (N = 5)                          | Tumor  | 0.13 ± 0.04         | 0.15 ± 0.03 | 0.18 ± 0.10 |
|                                              | Muscle | 0.09 ± 0.04         | 0.10 ± 0.04 | 0.09 ± 0.02 |
| Fractionated radiation (N = 5)               | Tumor  | 0.12 ± 0.04         | 0.15 ± 0.04 | 0.23 ± 0.03 |
|                                              | Muscle | 0.10 ± 0.04         | 0.11 ± 0.04 | 0.13 ± 0.04 |
| Trastuzumab → Fractionated radiation (N = 6) | Tumor  | 0.15 ± 0.04         | 0.19 ± 0.04 | 0.23 ± 0.05 |
|                                              | Muscle | 0.09 ± 0.04         | 0.12 ± 0.02 | 0.12 ± 0.02 |
