# Supplementary material for: Modulation of the Tumor Microenvironment with Trastuzumab Enables Radiosensitization in HER2+ Breast Cancer
Source: MDPI journal article supplement (doi:10.3390/cancers14041015), 2022-02-17
Supplement: s1 [file s1]

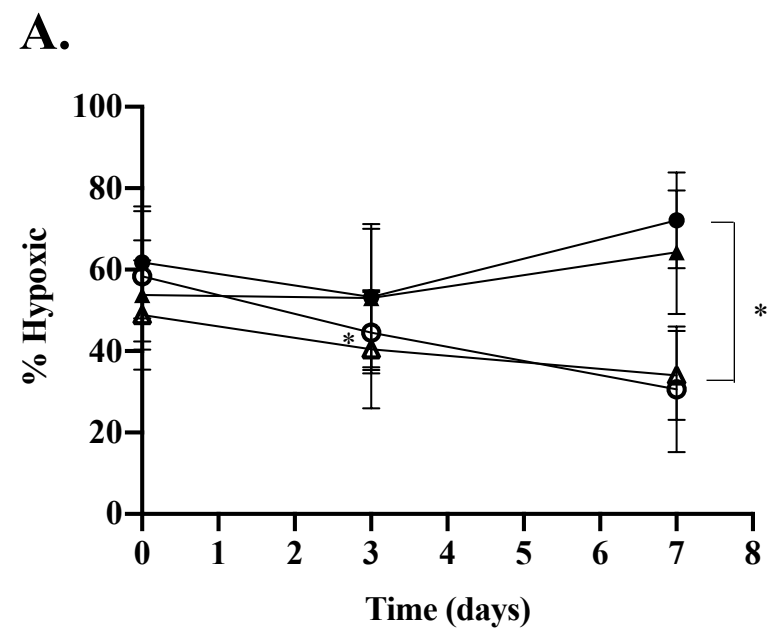

● Control  
○ Trastuzumab  
▲ Radiation  
△ Trastuzumab → radiation  
\* denotes  $p < 0.05$ .

**B. Control**

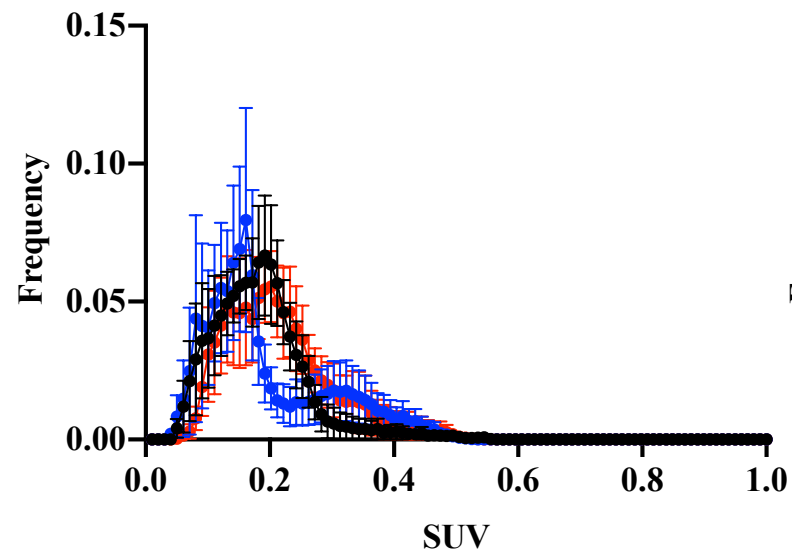

**C. Trastuzumab**

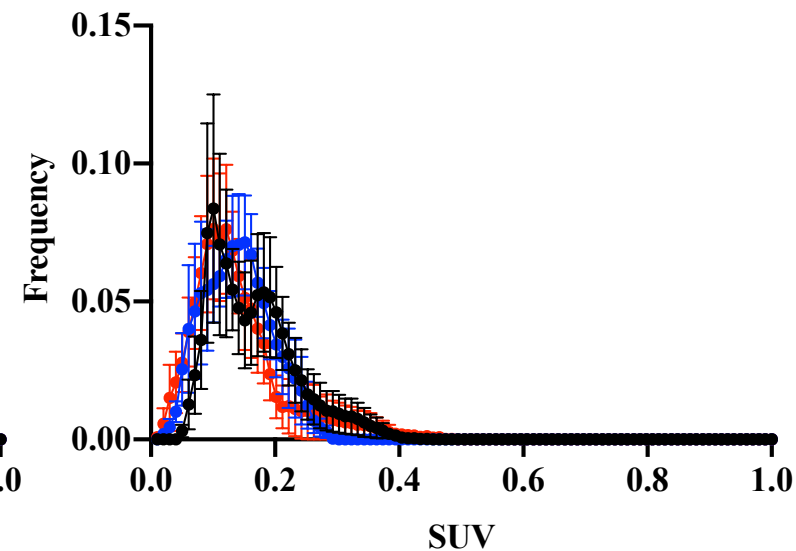

**D. Radiation**

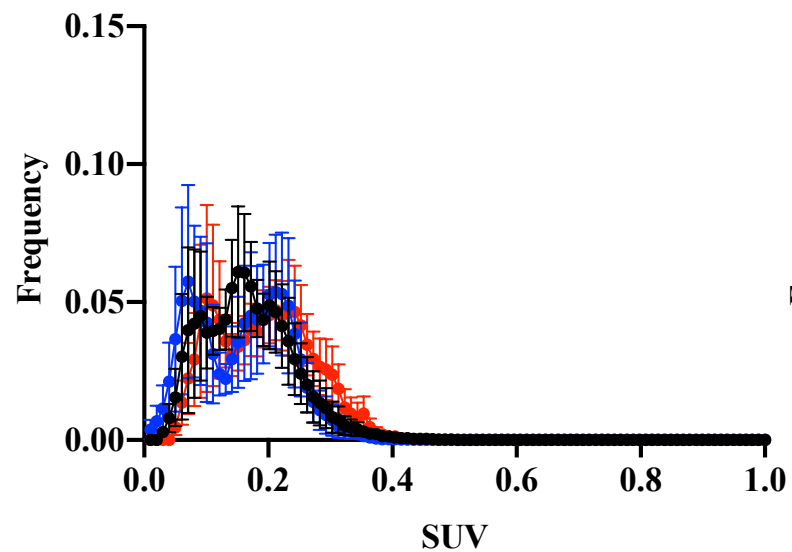

**E. Trastuzumab → radiation**

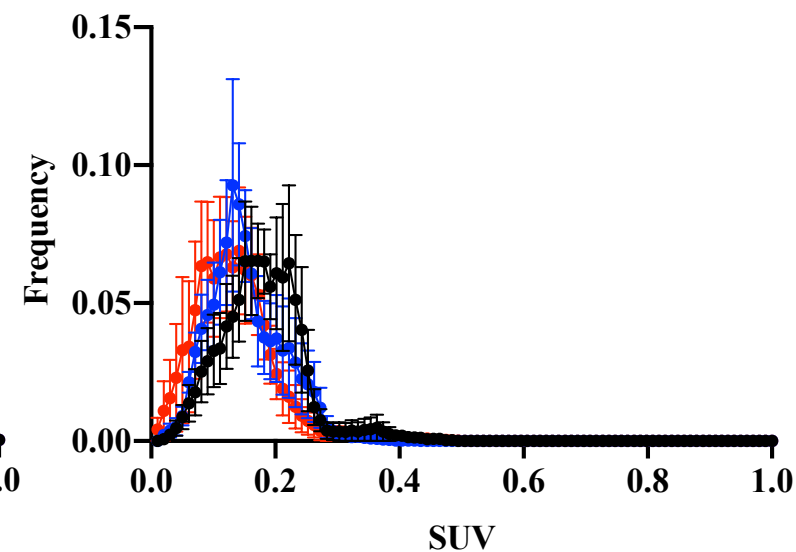

● Day 0    ● Day 3    ● Day 7
