# Supplementary figures and images for: Modulation of the Tumor Microenvironment with Trastuzumab Enables Radiosensitization in HER2+ Breast Cancer
Source: MDPI journal article supplement (doi:10.3390/cancers14041015), 2022-02-17

A.

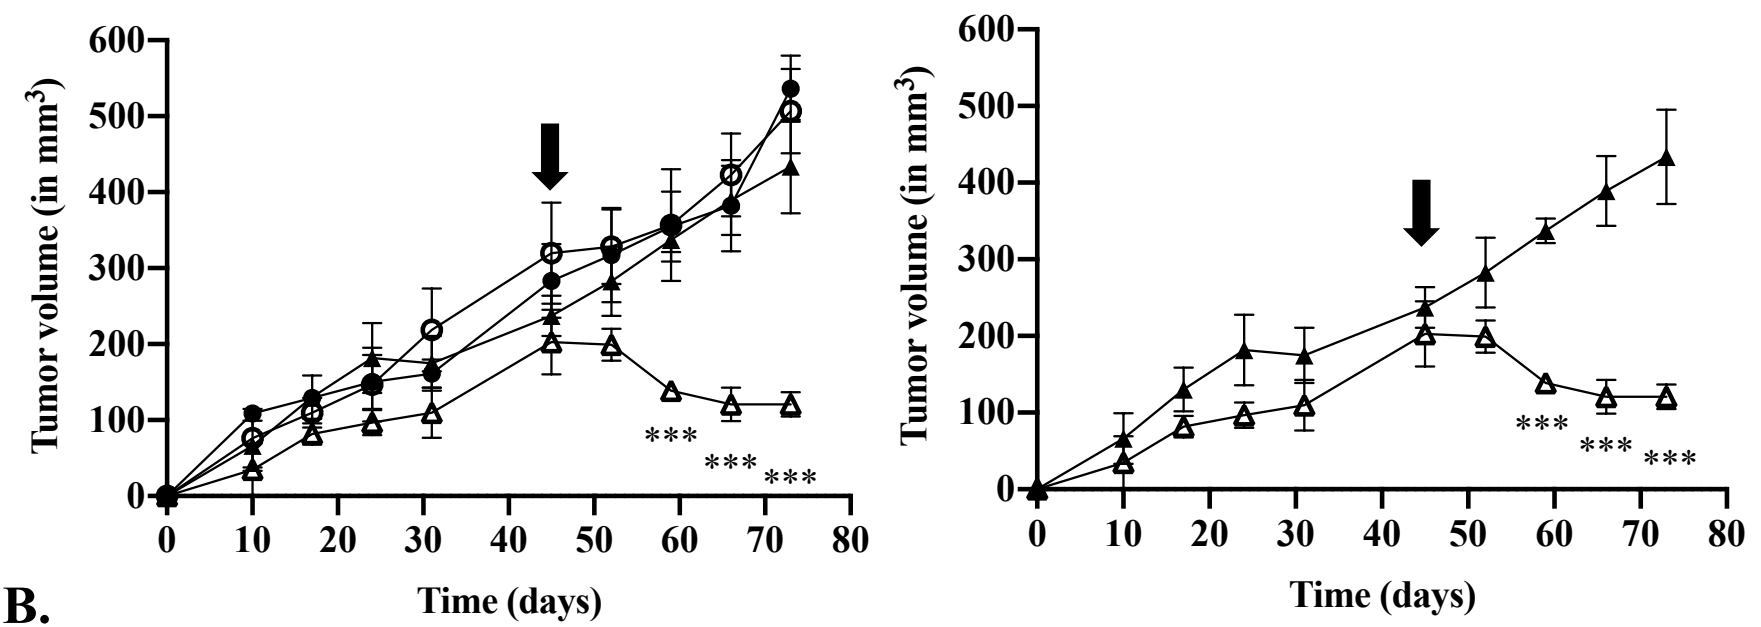

B.

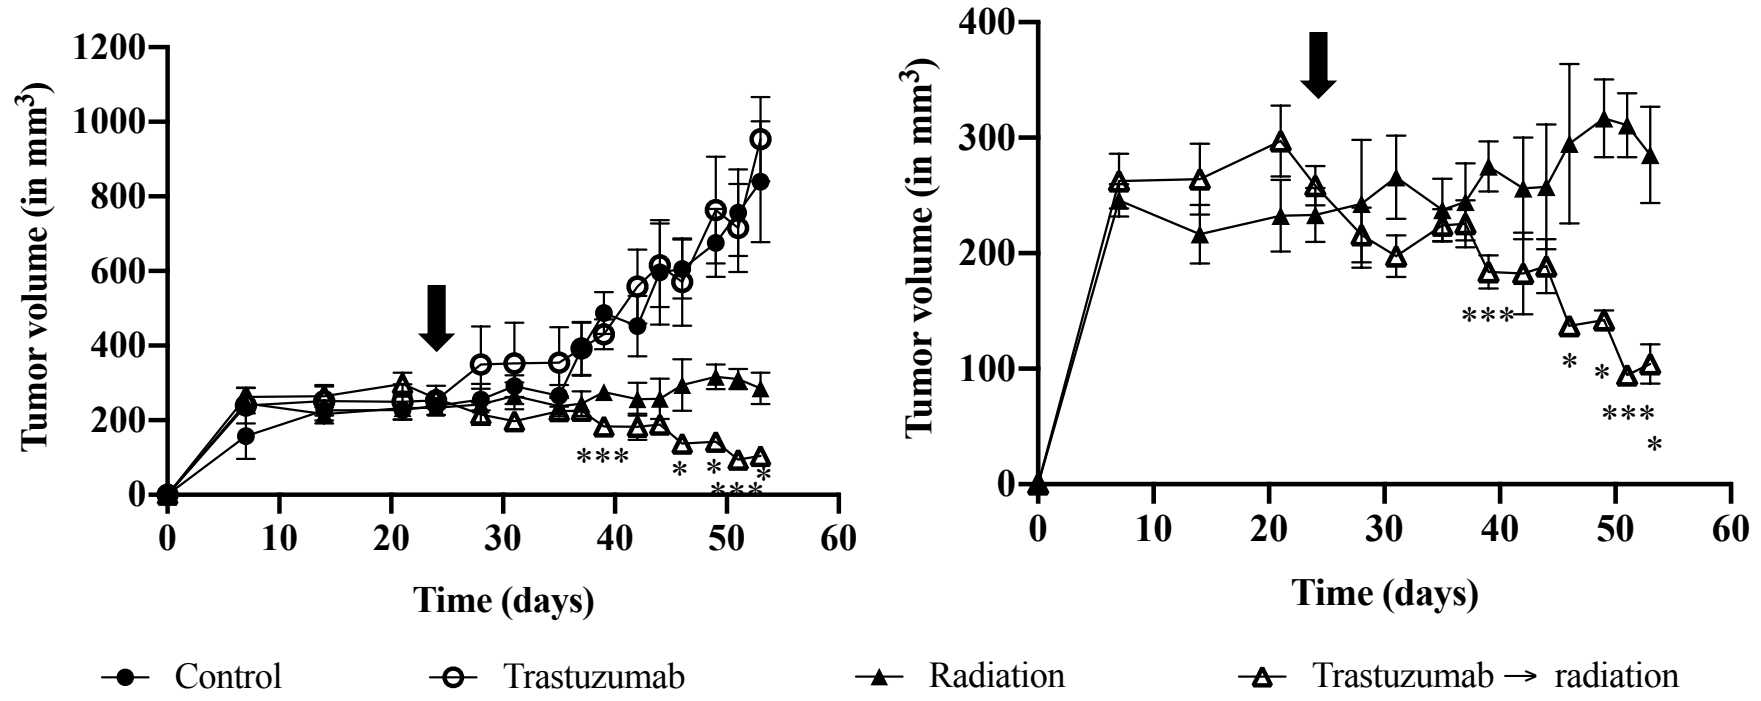

● Control      ○ Trastuzumab      ▲ Radiation      ▲ Trastuzumab → radiation

\* denotes  $p < 0.05$ . \*\*\* denotes  $p < 0.01$ .

Supplement: s1 [file s1]

**A.**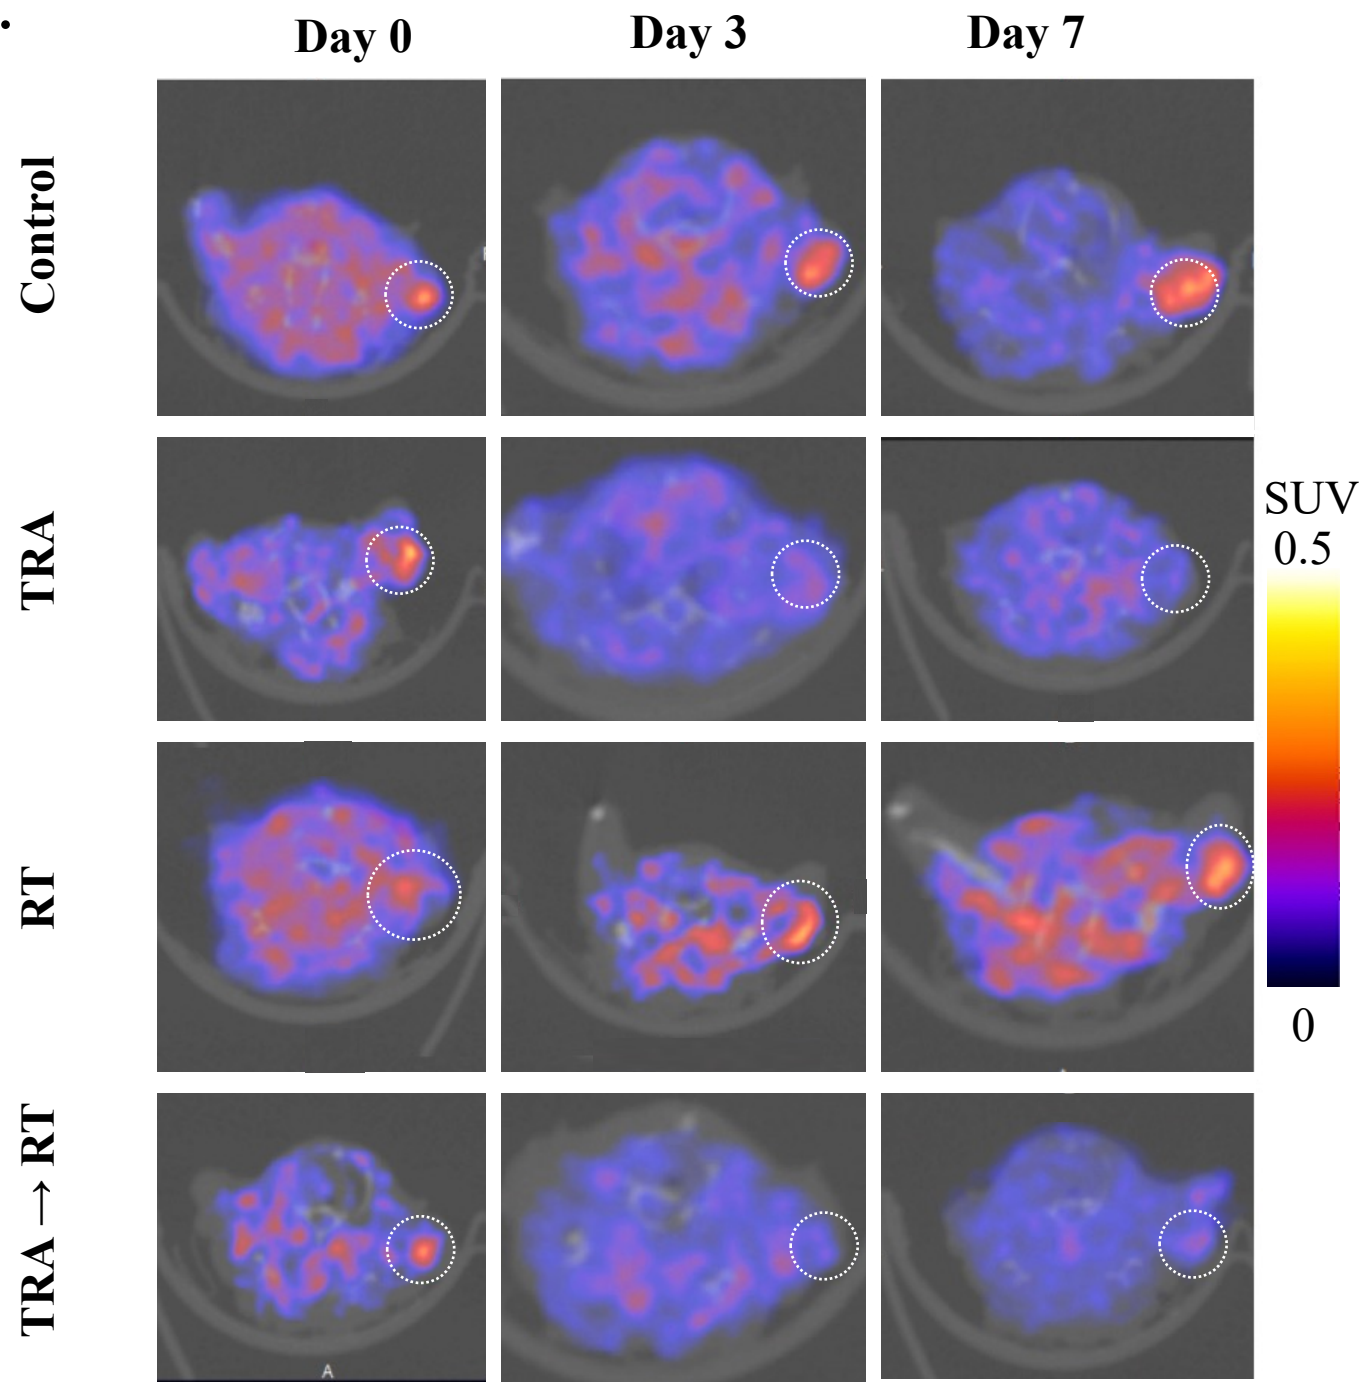**B.**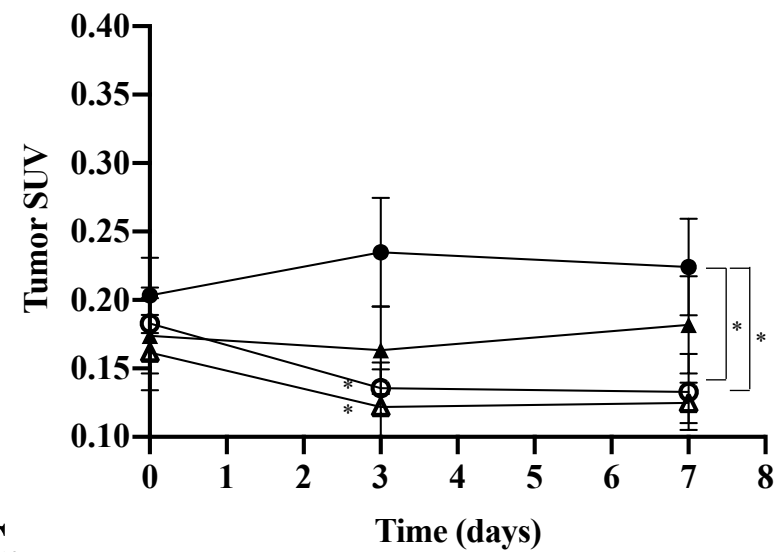**C.**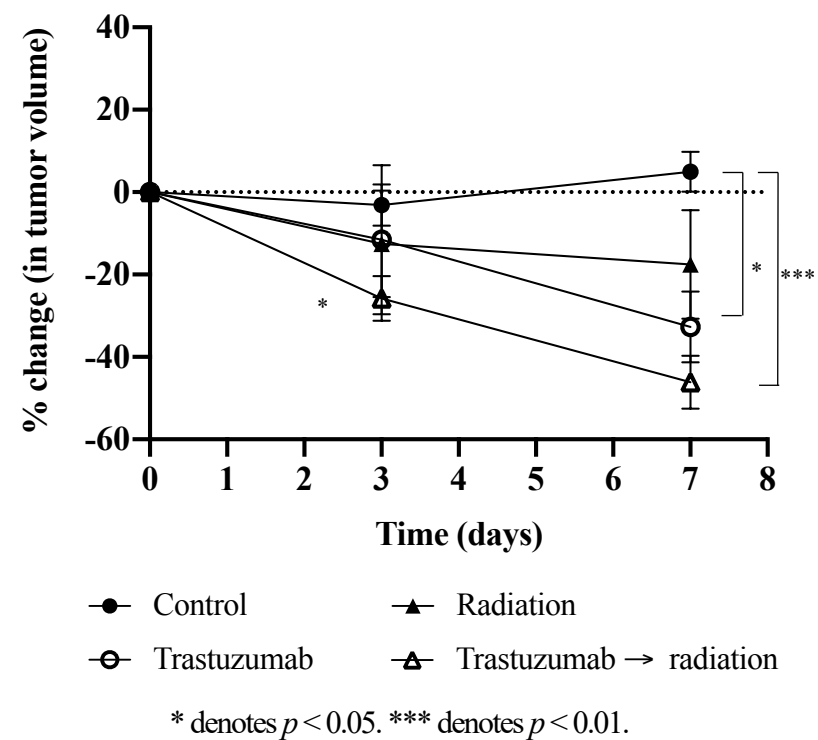

Supplement: s1 [file s1]
